# Supplementary material for: Synthesis of biochar/MoS 2 composite modified with poly(acrylic acid) (BC/MoS 2 /PAA) for the removal of Cd( ii ) and Pb( ii ) from wastewater
Source: Royal Society of Chemistry journal article supplement (doi:10.1039/d5ra03405a), 2025-01-01
Supplement: d5ra03405a1.pdf [file d5ra03405a1.pdf]

## Supplementary Materials

### **Synthesis of Biochar/MoS<sub>2</sub> Composite Modified with Poly (acrylic acid) (BC/MoS<sub>2</sub>/PAA) for the removal of Pb(II) and Cd(II) from Wastewater**

Salami Hammed Olawale <sup>a,b</sup>, Waleed Alahmad <sup>a</sup>, Ibrahim A. Darwish <sup>c</sup>, Mohammad Ashfaq <sup>d</sup>, Ryhan J. Darling <sup>e</sup>, Charoenkwan Kraiya <sup>a,b,\*</sup>

<sup>a</sup>Department of Chemistry, Faculty of Science, Chulalongkorn University, Bangkok 10330, Thailand.

<sup>b</sup> Electrochemistry and Optical Spectroscopy Center of Excellence, Department of Chemistry, Faculty of Science, Chulalongkorn University, Bangkok 10330, Thailand.

<sup>c</sup> Department of Pharmaceutical Chemistry, College of Pharmacy, King Saud University, P.O. Box 2457, Riyadh 11451, Saudi Arabia.

<sup>d</sup> Department of Biotechnology, School of Science, Woxsen University, Hyderabad, 502345, Telangana, India.

<sup>e</sup> Department of Biochemistry, Medical College of Wisconsin, Milwaukee, WI 53226, USA.

\* Corresponding author: [mohdashfaqbiotech@gmail.com](mailto:mohdashfaqbiotech@gmail.com), [charoenkwan.k@chula.ac.th](mailto:charoenkwan.k@chula.ac.th)

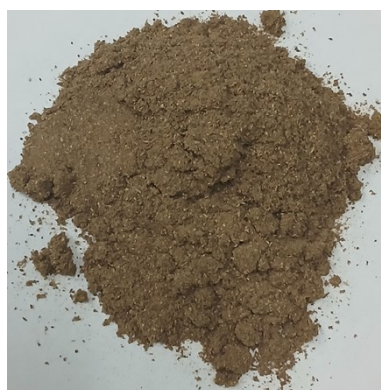

**Powdered coconut shell**

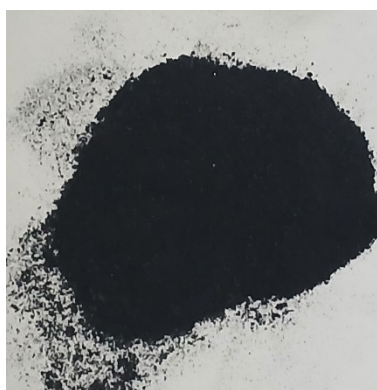

**Biochar (BC)**

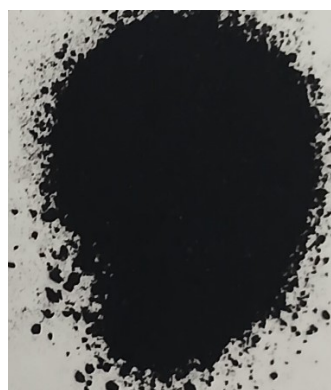

**BC/MoS<sub>2</sub>/PAA**

**Fig. S1.** Photograph of synthesize BC and BC/MoS<sub>2</sub>/PAA composite

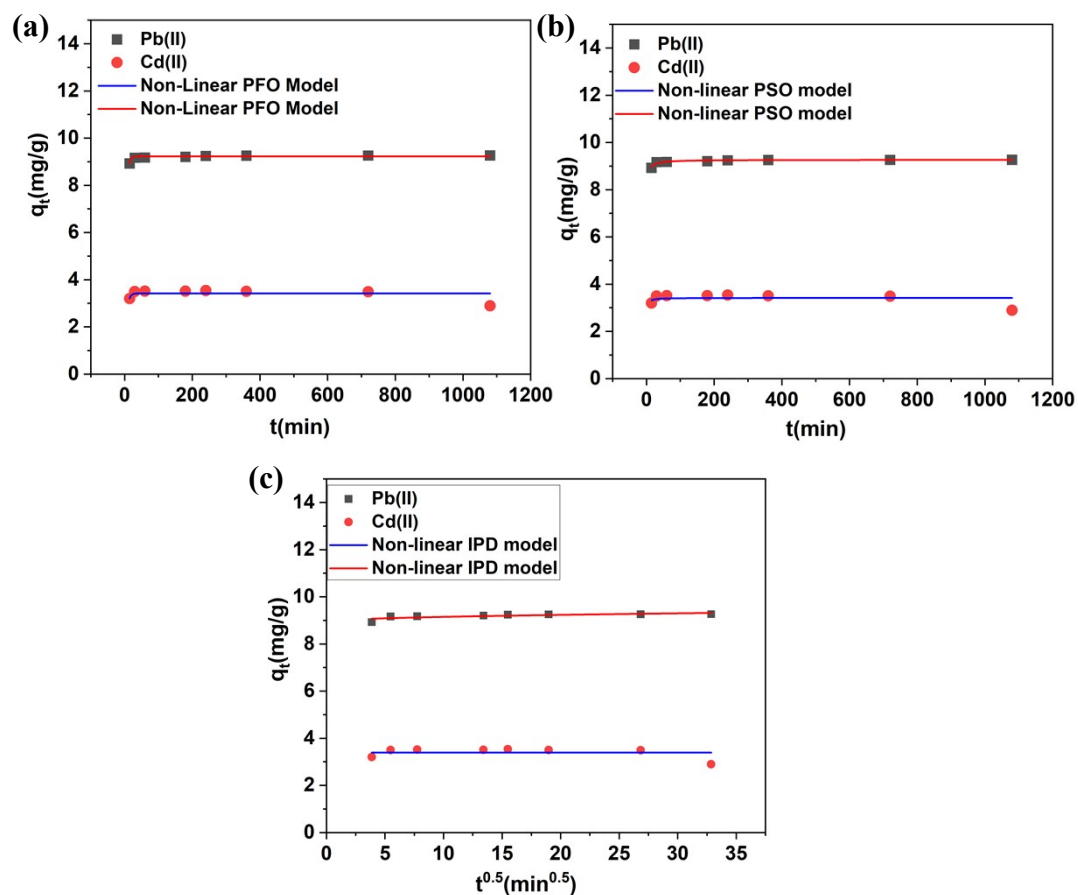

**Fig. S2.** Non-linear adsorption kinetic model analysis. (a) Pseudo-first order (PFO) (b) Pseudo-second order (PSO) (c) Intraparticle diffusion model (IPD) for Pb(II) and Cd(II). (Initial concentration: 10 mg/L; pH 6 for Pb(II); pH 7 for Cd(II); adsorbent dosage = 0.010 g for Pb(II), 0.025 g for Cd(II); volume = 10 mL) onto BC/MoS<sub>2</sub>/PAA).

**Table S1.** Kinetic models, non-linear equations for adsorption of Pb(II) and Cd(II) onto BC/MoS<sub>2</sub>/PAA composite

| Model                          | Non-linear equation                       |
|--------------------------------|-------------------------------------------|
| Pseudo-first order (PFO)       | $q_t = q_e(1 - e^{-k_1 t})$               |
| Pseudo-second order (PSO)      | $q_t = \frac{q_e^2 k_2 t}{q_e k_2 t + 1}$ |
| Intra-particle diffusion (IPD) | $q_t = k_{id} t^{1/2} + C$                |

Where  $q_e$  and  $q_t$  are the adsorbed amount at the equilibrium and time  $t$ , respectively (mg/g);  $k_1$  and  $k_2$  are the pseudo-first-order rate constant (min<sup>-1</sup>) and pseudo-second-order rate constant for the adsorption process (mg/g min);  $k_{id}$  is the intraparticle diffusion rate constant (mg/g min<sup>0.5</sup>); and  $C$  is a constant and proportional to boundary layer thickness, mg/g,  $q_{max}$  (mg/g) is the maximum adsorption capacity.

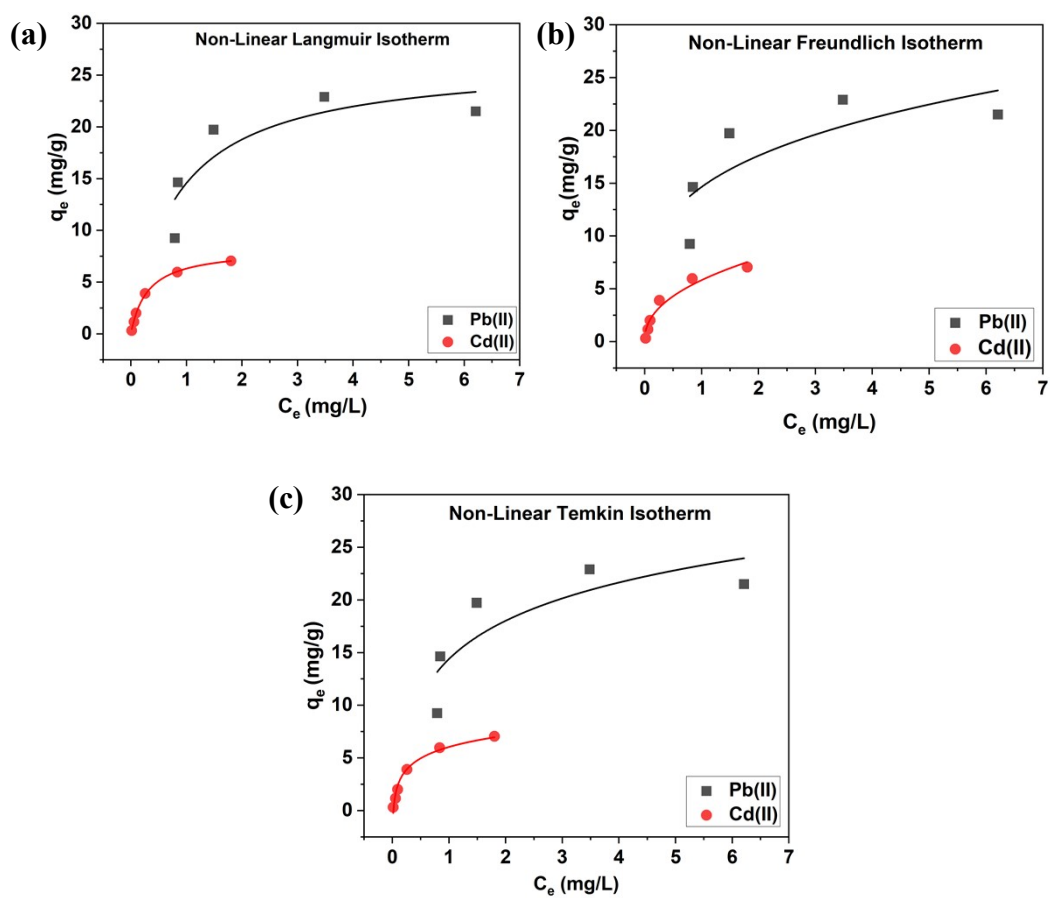

**Fig. S3.** Non-linear adsorption isotherm model analysis. (a) Langmuir (b) Freundlich (c) Temkin for Pb(II) and Cd(II). (Initial concentration: 10 mg/L; pH 6 for Pb(II); pH 7 for Cd(II); adsorbent dosage = 0.010 g for Pb(II), 0.025 g for Cd(II); volume = 10 mL) onto BC/MoS<sub>2</sub>/PAA).

**Table S2.** The leaching concentrations of Mo and S during adsorption of Pb(II) and Cd(II) onto BC/MoS<sub>2</sub>/PAA adsorbent at optimized conditions (Volume= 10 mL; pH = 6, dose = 0.010 g for Pb(II) and pH = 7, dose = 0.025 g for and Cd(II); contact time = 30 min for Pb(II) and Cd(II) and initial concentration =10 mg/L for Pb(II) and Cd(II)).

| Metals / Adsorbate | Concentration, mg/L |             |
|--------------------|---------------------|-------------|
|                    | Pb(II)              | Cd(II)      |
| Mo                 | 0.63±0.0023         | 3.4±0.012   |
| S                  | 3.39±0.035          | 1.68±0.0052 |

**Table S3.** Cost-analysis of 1 g prepared BC/MoS<sub>2</sub>/PAA composite and comparison with market price of activated carbon.

| <b>Raw materials</b>                                                               | <b>Amount</b> | <b>Unit</b> | <b>Cost (Baht)</b> |
|------------------------------------------------------------------------------------|---------------|-------------|--------------------|
| Waste coconut shell                                                                | 10            | g           | 0.0                |
| (NH <sub>4</sub> ) <sub>6</sub> Mo <sub>7</sub> O <sub>24</sub> .4H <sub>2</sub> O | 0.575         | g           | 3.66               |
| Thiourea                                                                           | 1.15          | g           | 0.0619             |
| Polyacrylic acid                                                                   | 0.50          | g           | 4.99               |
| Distilled water                                                                    | 100           | g           | 2.00               |
| Electricity (pyrolysis,<br>magnetic stirrer,<br>ultrasonication and furnace)       | 1.0366        | kWh         | 40.02              |
| <b>Total cost</b>                                                                  |               |             | <b>50.69</b>       |
| Commercial activated<br>carbon (Sigma Aldrich)                                     | 1             | g           | <b>80.34</b>       |
